# Supplementary material
Source: publisher figshare collection journal article supplement (https://sage.figshare.com/ndownloader/files/22659107)
Supplement: Supplementary file 1 [file 22659107]

## Documents in Sample

### 1. **International Consultant reports (9)**

- ACCENTURE LABS. 2018. Understandable AI: Explaining Machines. Accenture. Available at [https://www.accenture.com/\\_acnmedia/pdf-85/accenture-understanding-machines-explainable-ai.pdf](https://www.accenture.com/_acnmedia/pdf-85/accenture-understanding-machines-explainable-ai.pdf)
- EY 2014. Big risks require big data thinking. Global Forensic Data Analytics Survey 2014. EY Fraud Investigation and Disputes Service. Available at [www.ey.com/fids](http://www.ey.com/fids)
- GARTNER 2019. The CIO's Guide to Artificial Intelligence. Gartner. Feb 2019. Available at <https://www.gartner.com/smarterwithgartner/the-cios-guide-to-artificial-intelligence/>
- IBM. 2018. The AI-Enhanced customer experience. IBM Institute for Business Value. Available at [ibm.com/ibmix](http://ibm.com/ibmix)
- IBM 2019. Everyday Ethics for Artificial Intelligence. Available at [ibm.biz/everydayethics](http://ibm.biz/everydayethics)
- HENKE, N., BUGHIN, J., CHUI, M., et AL. (2016) *The Age of Analytics: Competing in a Data-Driven World*. McKinsey Global Institute. Feb., 2019. Available at <https://www.mckinsey.com/business-functions/mckinsey-analytics/our-insights/the-age-of-analytics-competing-in-a-data-driven-world>
- MCKINSEY. 2018. Notes from the AI Frontier: Insights from hundreds of use cases. Discussion paper
- MANYIKA, J., CHUI, M., BROWN, B., BUGHIN, J., DOBBS, R., ROXBURGH, C. & HUNG BYERS, A. 2011. Big Data: The Next Frontier for Innovation, Competition, and Productivity. McKinsey Global Institute.
- PWC. 2017. Sizing the Prize: What's the real value of AI for your business and how can you capitalise?

### 2. **European Commission and other agencies (4)**

- EC 2018. Artificial Intelligence for Europe. *European Commission COM (2018) 237*. Brussels: EC.
- EGE. 2018. Statement on Artificial Intelligence, Robotics and 'Autonomous Systems'. European Group on Ethics in Science and New Technologies. Brussels: European Commission.
- AI HLEG. 2018. Draft *Ethics Guidelines for Trustworthy AI*, High-Level Expert Group on Artificial Intelligence, Brussels: European Commission.
- AI HLEG. 2019. *Ethics Guidelines for Trustworthy AI*, High-Level Expert Group on Artificial Intelligence, Brussels: European Commission.

### 3. **UK and Ireland government & policy reports (8)**

- IRL FORFÁS & Expert Group on Future Skills Needs. 2014. Assessing the Demand for Big Data and Analytics Skills, 2013 - 2020. Dublin: Forfás.
- IRL INTERDEPARTMENTAL COMMITTEE ON SCIENCE, TECHNOLOGY AND INNOVATION, 2015. Innovation 2020. Excellence Talent Impact. Dublin: Government of Ireland.
- IRL DEPARTMENT OF BUSINESS, Enterprise and Innovation 2018. Research Priority Areas 2018-2022. Dublin: Government of Ireland.
- UK DEPARTMENT OF DIGITAL, CULTURE, MEDIA AND SPORT 2018. Centre for Data Ethics and Innovation. Government Response to Consultation. London: UK Government.
- UK DEPARTMENT FOR BUSINESS, ENTERPRISE AND INDUSTRIAL STRATEGY. 2016. Enabling a World Leading Regional Digital Economy through Data Driven Innovation. Edinburgh and South East Scotland City Region. Edinburgh: Scottish Government.
- UK TREASURY, HM. 2018. The economic value of Data: A discussion paper. London: UK Government
- UK OFFICE, CABINET. 2015. Draft framework for Data Science Ethics. London.
- UK HLSCAI 2018. *AI in the UK: Ready, Willing, and Able? Report of Session 2017-19*. Westminster, London: House of Lords Select Committee on Artificial Intelligence.

### 4. **Expert Consultations – (6)**

- ROYAL SOCIETY, 2017. Machine Learning: The power and promise of computers that learn by example. London: The Royal Society
- ROYAL SOCIETY, 2018. Portrayals and Perceptions of AI and why they matter. London: The Royal Society.
- UK COMMISSION, NATIONAL INFRASTRUCTURE 2017. Data for the Public Good. London: National Infrastructure Commission.
- UK DEPARTMENT FOR DIGITAL, CULTURE, MEDIA AND SPORT, 2018. Centre for Data Ethics and Innovation. Consultation London: UK Government.
- UK NESTA 2014 Model Workers. How leading companies are recruiting and managing their data talent. NESTA, Creative Skillset, Royal Statistical Society.
- IRL RESEARCH PRIORITISATION STEERING GROUP. 2011 Report of the Research Prioritisation Steering Group. Dublin: Forfás and DBEI.

## **5. Public surveys (6)**

EUROBAROMETER, 2015. Autonomous Systems. *Special Eurobarometer 427*. Brussels: European Commission.

EUROBAROMETER, 2017 *Attitudes towards the impact of digitisation and automation on daily life*, No. 460, Brussels: European Commission.

IPSOS/MORI, 2017 *Public views of machine learning*. Royal Society, London: UK.

IPSOS/MORI 2016. Public Dialogue on ethics of data science in government London: UK Government Data Science Partnership.

SFI, 2015. Science in Ireland Barometer. Dublin: SFI.

COMMISSIONER, IRISH DATA PROTECTION. 2013. Public Awareness Survey 2013. Dublin Data Protection Commissioner.

## **6. Professional Guidelines (3)**

ACM Code of Ethics and Professional Conduct (1992) Association for Computing Machinery (ACM) available at <http://ethics.acm.org/code-of-ethics>

ACM Code of Ethics and Professional Conduct (2018) Association for Computing Machinery (ACM) available at <https://www.acm.org/code-of-ethics>

IEEE 2019 Ethically Aligned Design: A Vision for Prioritizing Human Well-being with Autonomous and Intelligent Systems, First Edition (EAD1e).

## **7. Workers and Whistleblowers (5)**

BRELAND, A. 2018. "Amazon employees protest sale of facial recognition tech to law enforcement". *The Hill*. Washington DC: Capitol Hill Publishing Corporation. Available at <https://thehill.com/business-a-lobbying/393583-amazon-employees-protest-sale-of-facial-recognition-tech-to-law>

CADWALLADR, C. & GRAHAM-HARRISON, E. 2018. "Revealed: 50 million Facebook profiles harvested for Cambridge Analytica in major data breach". *The Guardian*, Sat 17 Mar 2018. Available at <https://www.theguardian.com/news/2018/mar/17/cambridge-analytica-facebook-influence-us-election>

NEWTON, C. 2019. "The Trauma Floor". *The Verge*. Washington DC and New York: Vox Media. Available at <https://www.theverge.com/2019/2/25/18229714/cognizant-facebook-content-moderator-interviews-trauma-working-conditions-arizona>

O'CONNELL, J. 2019. "Facebook's dirty work in Ireland: 'I had to watch footage of a person being beaten to death'". *The Irish Times* 30th March, 2019. Available at <https://www.irishtimes.com/culture/tv-radio-web/facebook-s-dirty-work-in-ireland-i-had-to-watch-footage-of-a-person-being-beaten-to-death-1.3841743>

WHITE, J. B. 2018. "Google ditches contract with US military after employee revolt". *The Independent*. London: Independent News and Media Ltd. Available at <https://www.independent.co.uk/life-style/gadgets-and-tech/news/google-project-maven-cancelled-military-ai-drones-pentagon-a8379821.html> ]

Total = 41

## Respondents to Survey

| Factor                                | Category                                             | Frequency  |
|---------------------------------------|------------------------------------------------------|------------|
| <b>Gender</b>                         | Male                                                 | 91 (55.5%) |
|                                       | Female                                               | 72 (43.9%) |
|                                       | Other                                                | 1 (0.6%)   |
| <b>Age</b>                            | Under 18 Years                                       | 2 (1.2%)   |
|                                       | 18-24 Years                                          | 58 (35.4%) |
|                                       | 25-34 Years                                          | 61 (37.2%) |
|                                       | 35-44 Years                                          | 19 (11.6%) |
|                                       | 45-64 Years                                          | 21 (12.8%) |
|                                       | 65 Years or Older                                    | 3 (1.8%)   |
| <b>Cultural Background</b>            | White Irish                                          | 51 (31.3%) |
|                                       | White Irish Traveller                                | 3 (1.8%)   |
|                                       | Other White Background                               | 84 (51.5%) |
|                                       | Black Irish, Black African                           | 0          |
|                                       | Other Black Background                               | 3 (1.8%)   |
|                                       | Chinese Irish                                        | 1 (0.6%)   |
|                                       | Other Asian Background                               | 9 (5.5%)   |
|                                       | Other Including Mixed Background                     | 12 (7.4%)  |
| <b>Religion</b>                       | Roman Catholic                                       | 33 (21.9%) |
|                                       | Church of Ireland                                    | 1 (0.7%)   |
|                                       | Other Christian                                      | 12 (7.9%)  |
|                                       | Islam                                                | 1 (0.7%)   |
|                                       | Jewish, Hindu, Buddhist                              | 0          |
|                                       | No Religion                                          | 95 (62.9%) |
|                                       | Other                                                | 9 (6%)     |
| <b>Highest Educational Attainment</b> | Primary or Below                                     | 3 (2%)     |
|                                       | Lower Secondary (junior certificate or equivalent)   | 1 (0.7%)   |
|                                       | Upper Secondary (leaving certificate or equivalent)  | 15 (10%)   |
|                                       | Post-Secondary (not third-level)                     | 26 (17.3%) |
|                                       | Third Level Degree or Higher                         | 105 (70%)  |
| <b>Employment</b>                     | Full-time employee                                   | 73 (49%)   |
|                                       | Part-time employee                                   | 27 (18.1%) |
|                                       | Self-employed                                        | 14 (9.4%)  |
|                                       | Unemployed                                           | 19 (12.8%) |
|                                       | Not available for work                               | 16 (10.7%) |
| <b>Industry If Employed</b>           | Agriculture, Mining, Quarrying, Forestry and Fishing | 1 (0.8%)   |
|                                       | Construction                                         | 1 (0.8%)   |
|                                       | Manufacturing                                        | 2 (1.6%)   |
|                                       | Transportation, Electric, Gas, and Sanitary Service  | 4 (3.1%)   |
|                                       | Information and Communication                        | 21 (16.3%) |
|                                       | Finance, Insurance, and Real Estate                  | 6 (4.7%)   |
|                                       | Education                                            | 28 (21.7%) |
|                                       | Arts, Entertainment and Recreation                   | 16 (12.4%) |
|                                       | Other Services                                       | 17 (13.2%) |
|                                       | Public Administration                                | 4 (3.1%)   |
|                                       | None of the above                                    | 29 (22.5%) |
| <b>Annual Income</b>                  | Less than €15,000                                    | 42 (31.6%) |
|                                       | €15,000 < €25,000                                    | 17 (12.8%) |
|                                       | €25,000 < €35,000                                    | 17 (12.8%) |
|                                       | €35,000 < €45,000                                    | 13 (9.8%)  |
|                                       | €45,000 < €55,000                                    | 10 (7.5%)  |
|                                       | €55,000 < €65,000                                    | 6 (4.5%)   |
|                                       | €65,000 < €75,000                                    | 11 (8.3%)  |
|                                       | €75,000 or more                                      | 17 (12.8%) |
